# Supplementary material for: Circular RNA NEK6 contributes to the development of non-small-cell lung cancer by competitively binding with miR-382-5p to elevate BCAS2 expression at post-transcriptional level
Source: BMC Pulm Med. 2021 Oct 18;21:325. doi: 10.1186/s12890-021-01617-0 (PMC8524891; doi:10.1186/s12890-021-01617-0)
Supplement: Supplementary file 3 — Additional file 3: Table 1. Sequences of primers and reaction condition [file 12890_2021_1617_MOESM3_ESM.xlsx]

## Sheet: Sheet1
Gene name	Primer sequence	Reaction condition
circ_NEK6-F	TCCCGGAGAGGACAGTATGG	predegeneration：95°C,15s amplification（fluorescence）：58°C，60s circulation：40
circ_NEK6-R	GAGGGCACGAACTAGGGAGT
linear NEK6-F	GGAGATGCCCAGGAGAGAAG
linear NEK6-R	CCTCTGTGGGTCAGGAGGAT
U6-F	CTCGCTTCGGCAGCACA
U6-R	AACGCTTCACGAATTTGCGT
Gene name	FISH probe sequence
circ_NEK6	gcgguggcggcggcggcggaaccgagcugacgggcgugcggccgcugcgccgcaaacucgugugggacgcaccgcuccagccgcccgcgggccagcgcaccggucccccagcggcagccgagcccgcccgcgcgccguucgugcccucgugaggcuggcaugcaggauggcaggacagcccggccacaugccccauggagggaguuccaacaaccucugccacacccuggggccugugcauccuccugacccacagaggcaucccaacacgcugucuuuucgcugcucgcuggcggacuuccagaucgaaaagaagauaggccgaggacaguucagcgagguguacaaggccaccugccugcuggacaggaagacaguggcucugaagaaggugcagau…
Gene name	qRT-PCR primer sequence
miR-382-5p	Sequence:gaagttgttc gtggtggattcg
	Reverse transcription stem loop primer: CTCAACTGGTGTCGTGGAGTCGGCAATTCAGTTGAGCcgaatcc
	miRNA Stem loop universal reverse primer: CTCAACTGGTGTCGTGGA
	F:CCGAGgaagttgttc gtggt
BCAS2-F	GCCCCGGATTATTCTGCCTT
BCAS2-R	GGGGCTGGAAGCTCATATCG
